# Supplementary material for: Brain fog in chronic pain: A concept analysis of social media postings
Source: publisher site journal article supplement (doi:10.1515/ohe-2025-0077), 2025-01-01
Supplement: Supplementary file 1 [file ohe-2025-0077_sm.xlsx]

## Sheet: Twitter
Post	Author	Date posted	Date retrieved	Stakeholder type (PWLE =3, HCP=2, Researcher=1)	Attributes	Attributes (yes= 1, no=0)	Antecedent	Antecedent (yes= 1, no=0)	Symptoms/Consequences					Symptom/consequence (yes=1, no=0)	Management strategy					Management strategy (yes=1, no=0)	Comments
									Body functions	Activities	Participation	Environmental factors	Personal factors		Body functions	Activities	Participation	Environmental factors	Personal factors

## Sheet: Facebook
Post	Author	Date posted	Date retrieved	Stakeholder type (PWLE =3, HCP=2, Researcher=1)	Attributes	Attributes (yes= 1, no=0)	Antecedent	Antecedent (yes= 1, no=0)	Symptoms/Consequences					Symptom/consequence (yes=1, no=0)	Management strategy					Management strategy (yes=1, no=0)	Comments
									Impairments of body functions (e.g., mental functions, sensory functions, voice and speech, cardiovascular, digestive and metabolic, reproductive, neuromusculoskeletal and movememt, skin and related)	Impairment of body structures (Nervous system, eye, ear , voice and speech, cardiovascular, digestive/metabolism, endocrine, reproductive, movement, skin)	Activity limitations and participation restriction (e.g., learning and applying knowledge, general tasks and demands, communication, mobility, selfcare, domestic life, interpersonal interactions and relationships, major life areas, community, social and civic life)	Environmental factors (e.g., products and technology, natural environment and human made changes, support and relationships, attitudes, services/systems/policies)	Overall	b	Impairments of body functions (e.g., mental functions, sensory functions, voice and speech, cardiovascular, digestive and metabolic, reproductive, neuromusculoskeletal and movememt, skin and related)	Impairment of body structures (Nervous system, eye, ear , voice and speech, cardiovascular, digestive/metabolism, endocrine, reproductive, movement, skin)	Activity limitations and participation restriction (e.g., learning and applying knowledge, general tasks and demands, communication, mobility, selfcare, domestic life, interpersonal interactions and relationships, major life areas, community, social and civic life)	Environmental factors (e.g., products and technology, natural environment and human made changes, support and relationships, attitudes, services/systems/policies)	Overall
A little look into what brain fog can feel like and how it can impact your daily life 🌥️ Chronic pain also affects the brain! A lot of those who struggle with chronic pain also experience cognitive difficulties, or brain fog 🧠 Symptoms are different for everyone, but some of the most common symptoms are ⬇️ ☁️ Inability to focus or stay focused for more than a short amount of time ☁️ Making freque…	Rare visibility	2023-01-29	Feb 1 st 2023	3	Inability to focus or stay focused for more than a short amount of time ☁️ Making frequent mistakes ☁️ Forgetting things often ☁️ Being indecisive and easily overwhelmed ☁️ Inability to multitask ☁️ Inability to find your words ☁️ Hard time following conversations	1
Brain fog: when your thoughts decide to take the scenic route and get lost on the way.	Chronic pain voices	2022-12-02	Feb 1 st 2023	3							Thoughts get lost
#MarketingMonday Are you suffering with chronic pain? Brain fog? Trouble sleeping . It may be time for som self care. The Holidays have us doing for others but it's nearly February now. If you haven't treated yourself it's time and I bet your body is giving you signs. We offer Float therapy in a spa environment. (Float in massive amounts of Epsom salts ) Blissful Waters Float Center has three lar…	I love conroe	2023-01-20	Feb 1 st 2023	4		0		0											self care float theray	marketing their own product
READ BELOW to see what we're giving away👀 Thousands of people are falling through the cracks of our medical system. Brain fog. Chronic Fatigue. Chronic pain. Being told, “it’s all in your head”... Many of my client's symptoms are so bad they can’t hold a job. They can’t go to their kids' soccer games or have a normal social life. Yet they are told they're fine. When I was 25, my body shut down. I…	Dr. Jaban Moore	2022-11-25	Feb 1 st 2023	3							-can't attend kids games								Health foundations starter kit	marketing their own product
Chronic Pain, Weight Issues, Brain Fog, Depression, Poor Digestion, Acne, Low Energy? These are the top 6 types of foods that can contribute: 1. Gluten - The gluten protein found in many of today's grains (and added to lots of processed foods, cosmetics, etc) is extremely inflammatory for several reasons, not the least of which glutinous grains are usually sprayed with harmful pesticides to incre…	Acuplus wellness clinic	2021-08-06	Feb 1 st 2023	2		0		0											foods that may impact (gluten, dairy, vegetables, sugar, excessive alchocola, processed carbs and meat,)
